# Supplementary material
Source: MDPI journal article supplement (https://www.mdpi.com/2079-9284/10/6/163)
Supplement: s1 [file s1]

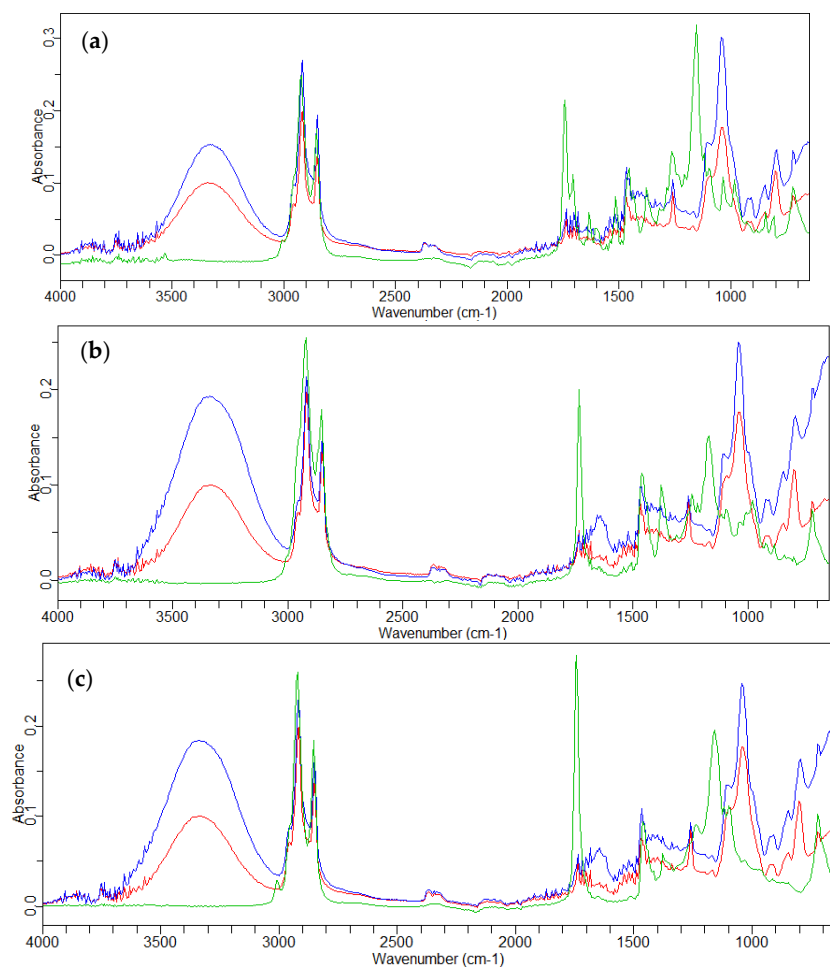

**Figure S1.** Overlay of the FT-IR spectra: (a): — Rice germ oil GX-N; — conditioner (control); — conditioner GX-N; (b): — Rice germ oil (PRO-15); — conditioner (control); — conditioner PRO-15; (c): — Riceterol esters; — conditioner (control); — conditioner RSE.

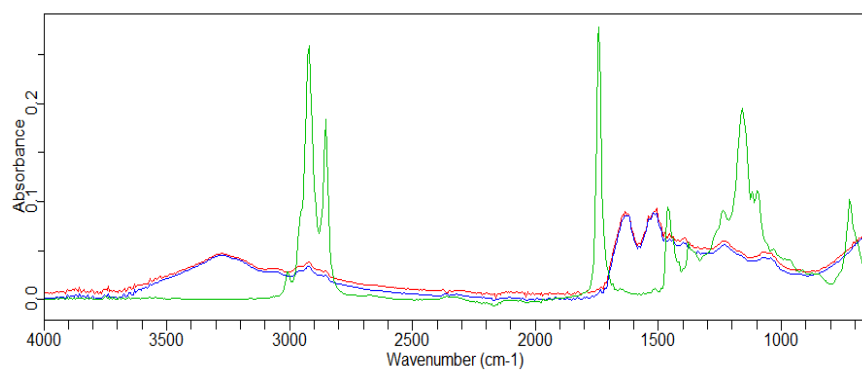

**Figure S2.** Overlay of the FT-IR spectra of PRO-15 (—); untreated hair central part (—); hair central part treated with PRO-15(—).

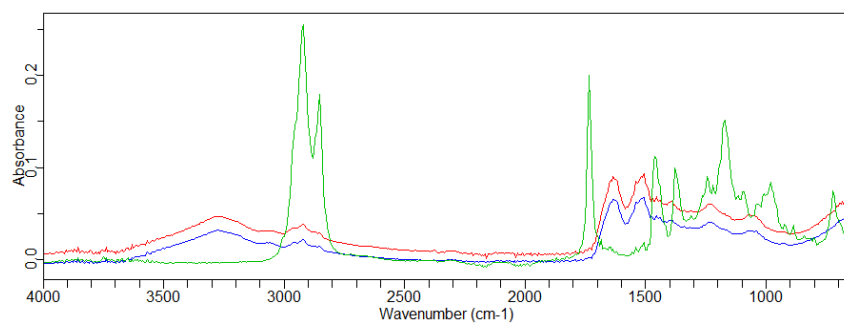

**Figure S3.** Overlay of the FT-IR spectra of RSE (—); untreated hair central part (—); hair central part treated with RSE (—).

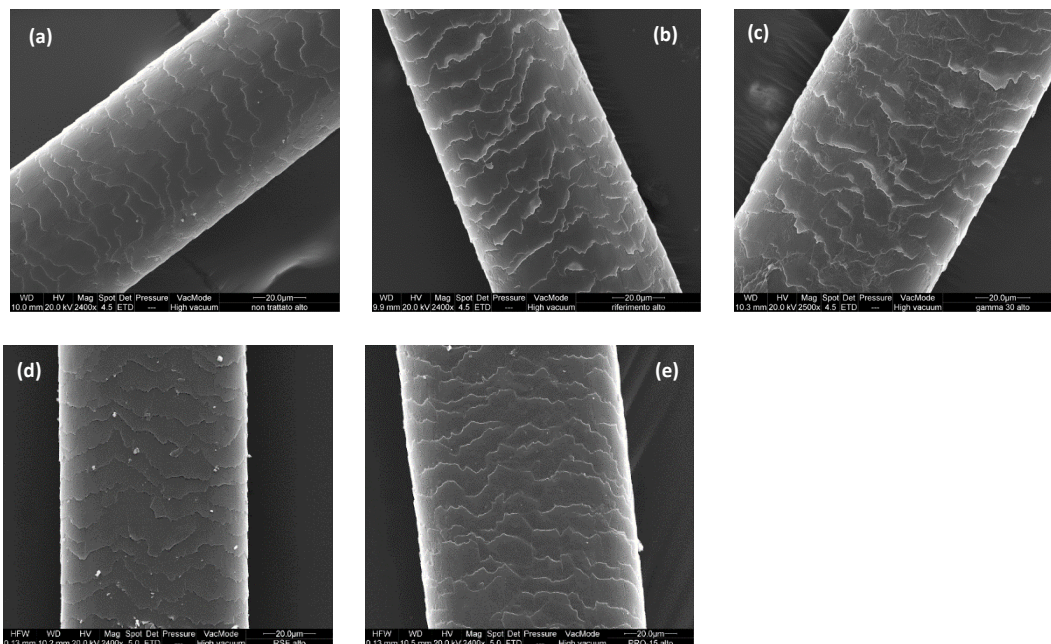

**Figure S4.** SEM images of hair upper part: (a) untreated; (b) treated with conditioner (control); (c) treated with conditioner GX-N; (d) treated with conditioner RSE; (e) treated with conditioner PRO-15.

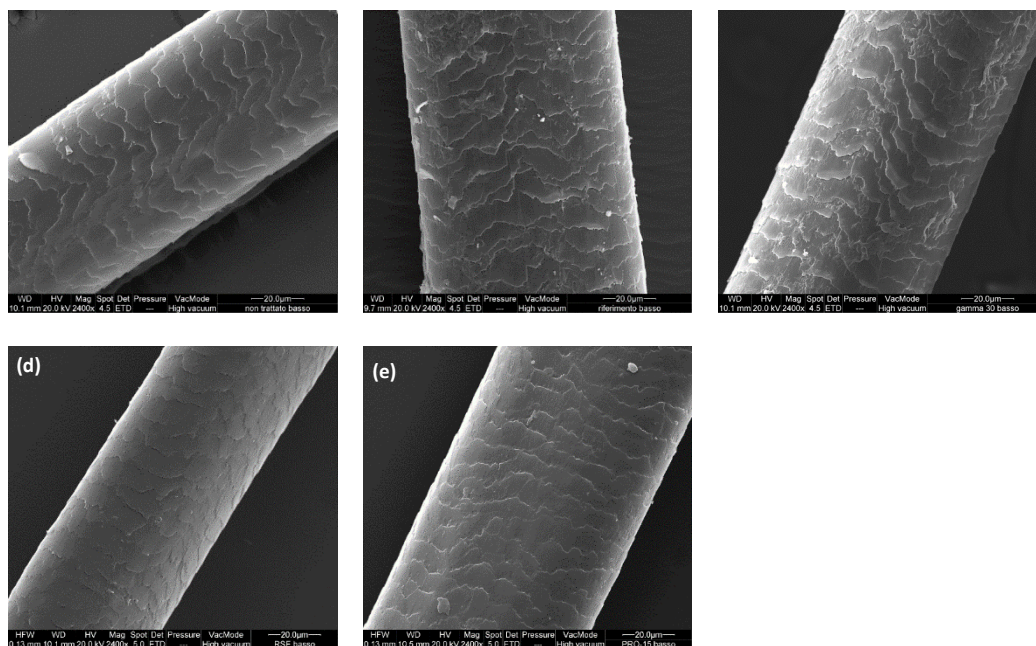

**Figure S5.** SEM images of hair lower part: (a) untreated; (b) treated with conditioner (control); (c) treated with conditioner GX-N; (d) treated with conditioner RSE; (e) treated with conditioner PRO-15.

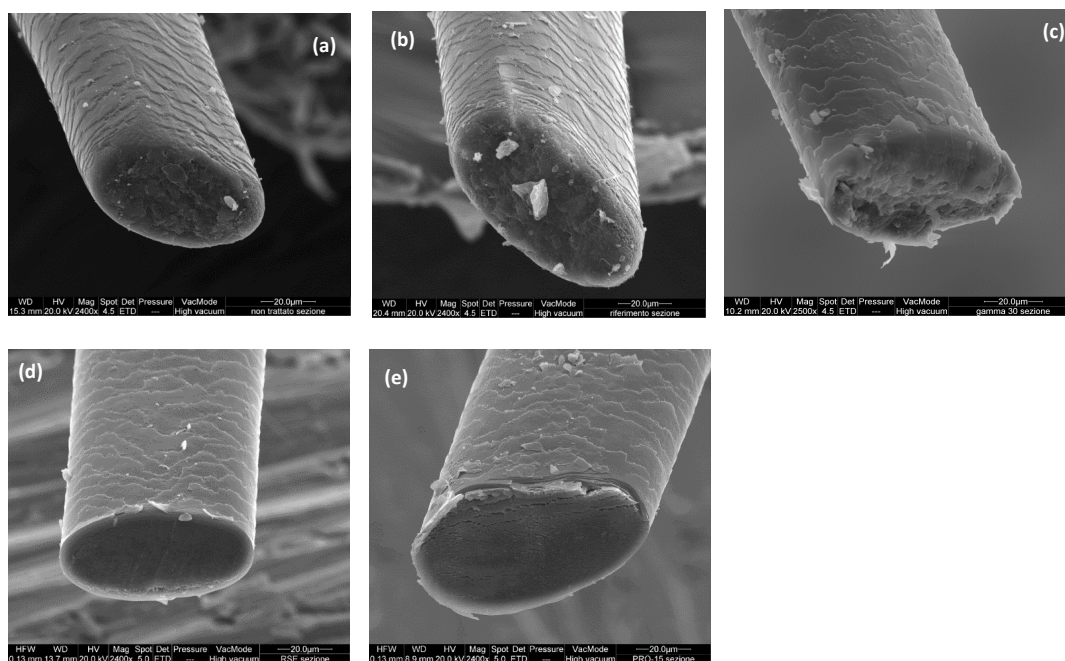

**Figure S6.** SEM images of hair cross-section: (a) untreated; (b) treated with conditioner (control); (c) treated with conditioner GX-N; (d) treated with conditioner RSE; (e) treated with conditioner PRO-15.



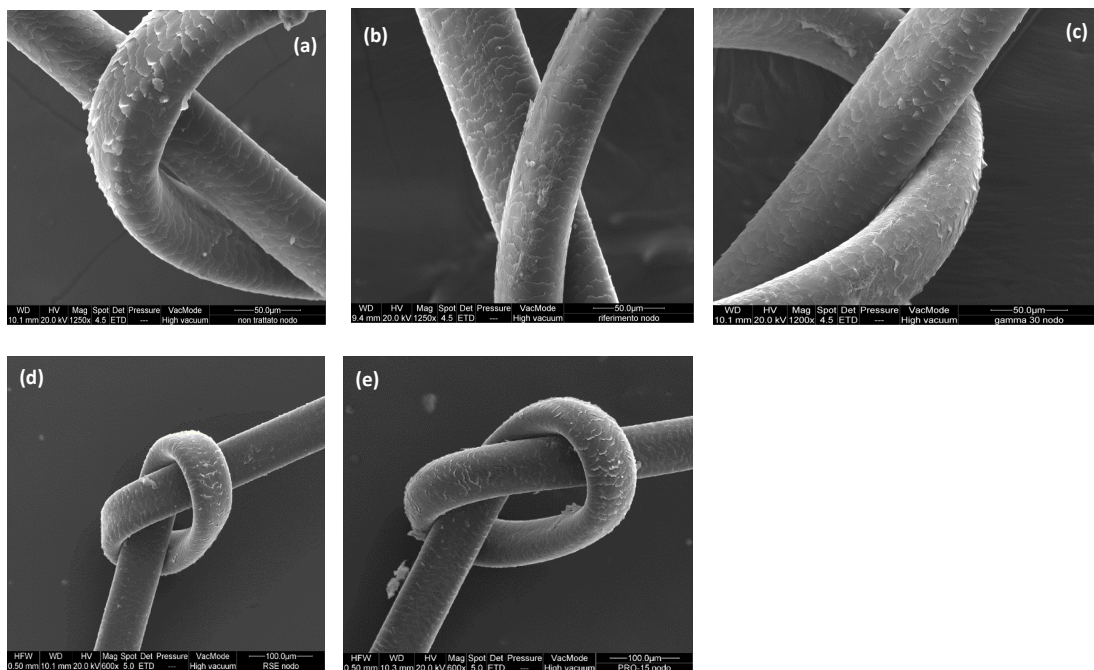

**Figure S7.** SEM images of knotted hair: (a) untreated; (b) treated with conditioner (control); (c) treated with conditioner GX-N; (d) treated with conditioner RSE; (e) treated with conditioner PRO-15.

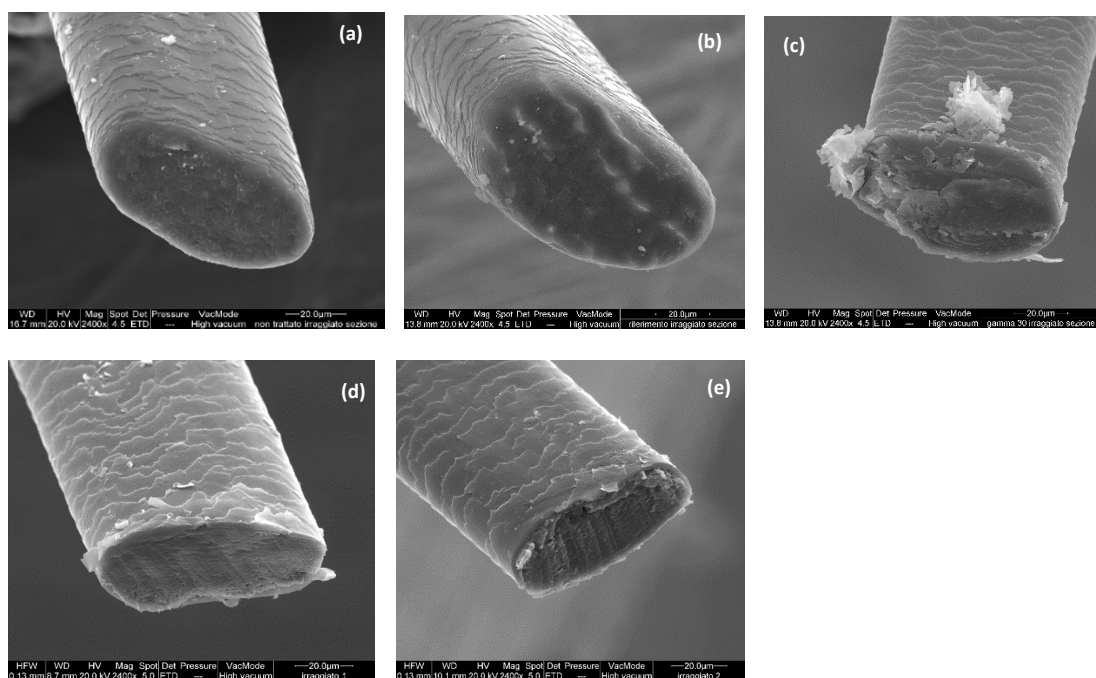

**Figure S8.** SEM images of irradiated hair cross-section: (a) untreated; (b) treated with conditioner (control); (c) treated with conditioner GX-N; (d) treated with conditioner RSE; (e) treated with conditioner PRO-15.

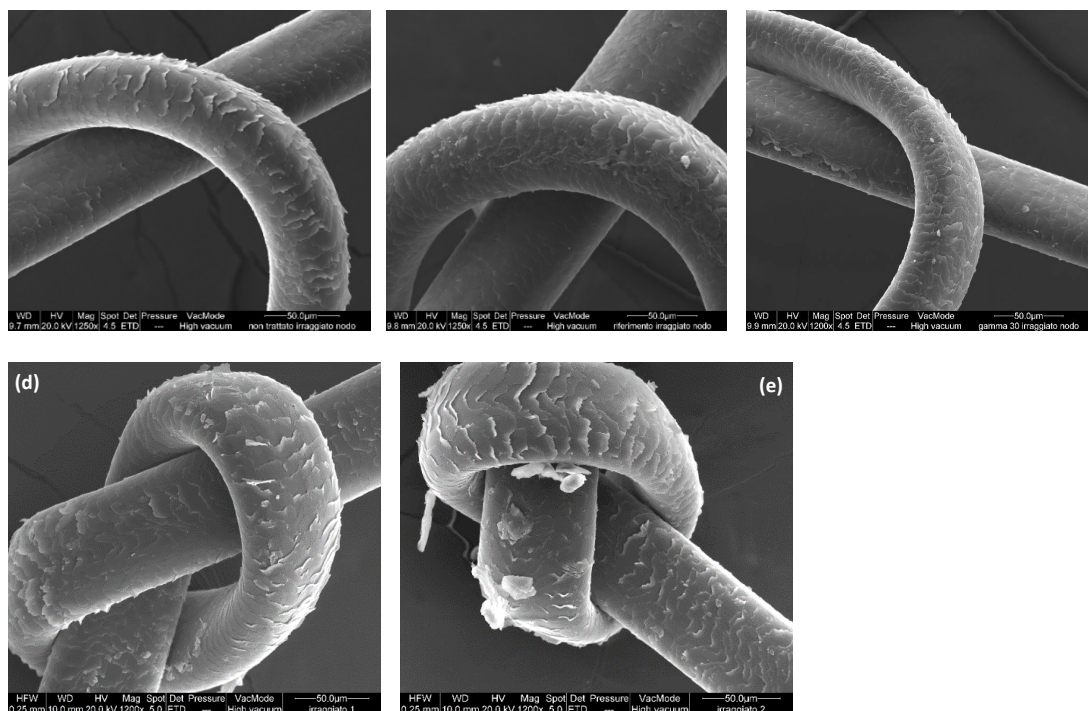

**Figure S9.** SEM images of irradiated knotted hair: (a) untreated; (b) treated with conditioner (control); (c) treated with conditioner GX-N; (d) treated with conditioner RSE; (e) treated with conditioner PRO-15.

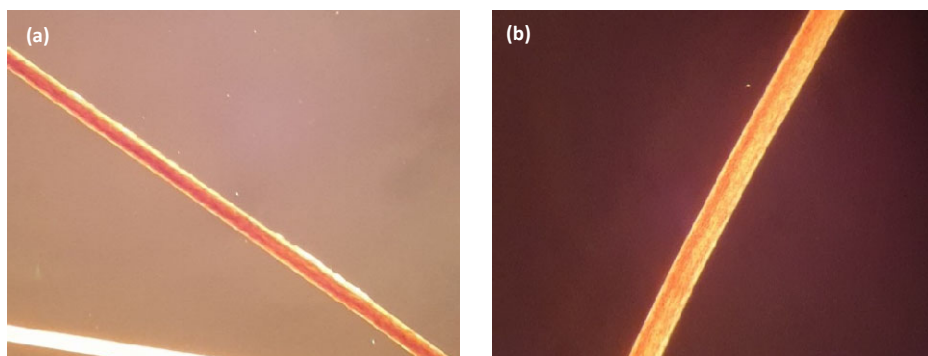

**Figure S10.** Polarized light microscopy images of hair untreated: (a) non irradiated; (b) irradiated.

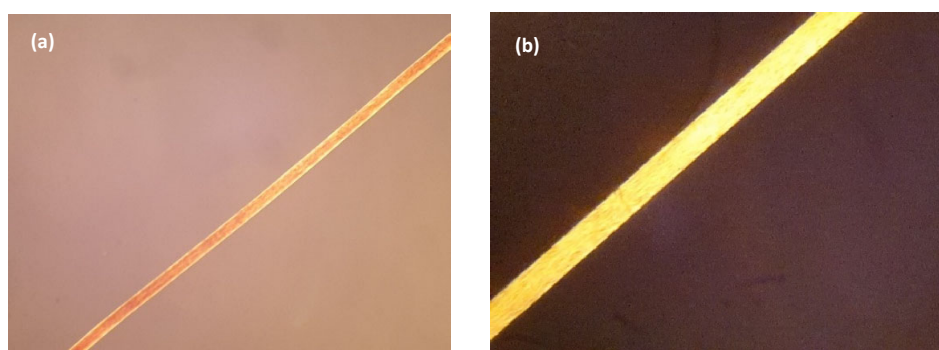

**Figure S11.** Polarized light microscopy images of hair treated with control conditioner: (a) non irradiated; (b) irradiated.

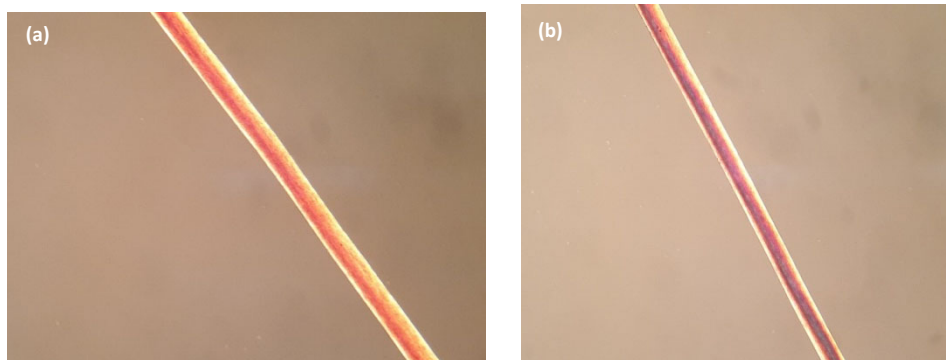

**Figure S12.** Polarized light microscopy images of hair treated with conditioner PRO-15: (a) non irradiated; (b) irradiated.

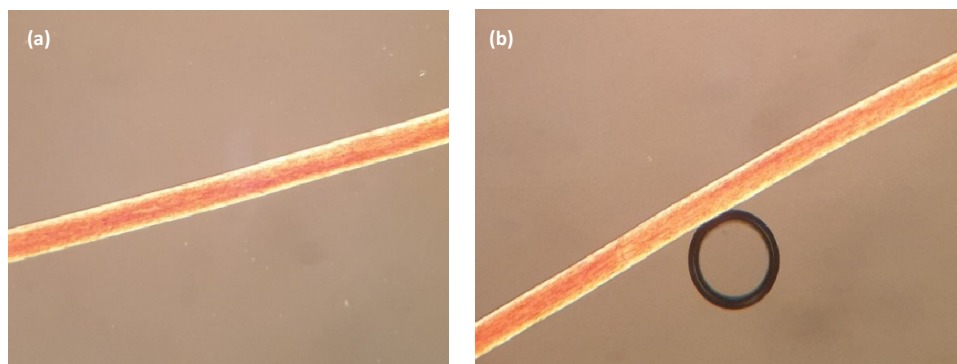

**Figure S13.** Polarized light microscopy images of hair treated with conditioner RSE: (a) non irradiated; (b) irradiated.
